# Supplementary material for: The variability and predictors of quality of AIDS care services in Brazil
Source: PubMed Central journal article supplement (PMC2671500; doi:10.1186/1472-6963-9-51), 2009-03-20
Supplement: 1472-6963-9-51-S2.pdf [file 1472-6963-9-51-S2.pdf]

## AVALIAÇÃO DA QUALIDADE DA ASSISTÊNCIA AMBULATORIAL NOS SERVIÇOS PÚBLICOS DE ATENÇÃO À AIDS NO BRASIL

Serviço: \_\_\_\_\_

Município/ Estado: \_\_\_\_\_

Endereço: \_\_\_\_\_

Responsável pelo serviço de HIV/AIDS: \_\_\_\_\_

Responsável pelo preenchimento do questionário: \_\_\_\_\_

Função: \_\_\_\_\_

Contatos para conferência: Telefone: \_\_\_\_\_ Fax: \_\_\_\_\_

E-mail: \_\_\_\_\_

### I. Identificação e características gerais do serviço de HIV/Aids

1. Qual a instituição **gestora**\*\* deste serviço?

**Assinale apenas uma alternativa**

- (1) Secretaria de Estado da Saúde
- (2) Secretaria Municipal de Saúde
- (3) Universidade pública
- (4) Universidade privada
- (5) Ministério da Saúde
- (6) Consórcio intermunicipal
- (7) Outros

\*\* instituição que assume a responsabilidade técnica e administrativa em relação ao serviço

\* Essa pesquisa conta também com o apoio da Fundação de Amparo à Pesquisa do Estado de São Paulo -FAPESP

© 2003 Equipe de Pesquisa QualiAids. Todos os direitos reservados. É proibida a reprodução do conteúdo desta página em qualquer meio de comunicação, eletrônico ou impresso, sem autorização dos responsáveis pelo conteúdo.

2. Esse serviço de assistência à HIV/aids está localizado em uma unidade do tipo:

[ASSINALE APENAS UMA ALTERNATIVA](#)

(1) Ambulatório de assistência a várias especialidades  
 (2) Ambulatório de assistência especializada às pessoas vivendo com HIV/aids (ambulatório de DST/HIV/aids isolado)  
 (3) Ambulatório vinculado a Hospital  
 (4) Unidade básica de saúde

---

3. Quantos **pacientes** com HIV/aids **estão atualmente em seguimento** ambulatorial?

Considerar **todos** os pacientes em uso ou não de antiretroviral. Buscar informações no SICLOM e SISCEL

(1) Número de pacientes com idade acima de 13 anos \_\_\_\_\_  
 (2) Não é possível obter esses dados

---

4. Quantas **consultas médicas** são realizadas por esse serviço de HIV/aids por mês ?

~~☒~~ **Considere a média mensal de consultas realizadas por esse serviço no último ano\*.**  
~~☒~~ **Considere EXCLUSIVAMENTE o número de consultas médicas realizadas por infectologistas ou clínicos responsáveis pelo seguimento dos pacientes com HIV/aids. Não incluir consultas de ginecologia ou de outras especialidades**

(1) Consultas/mês de HIV/aids realizadas com pacientes acima de 13 anos: \_\_\_\_\_  
 (2) Não é possível obter esse dado.

\* considere o período de 01 / Jan. a 31 / Dez. do ano anterior ao preenchimento do questionário

---

5. Quantos pacientes HIV/aids maiores de 13 anos **foram agendados** para consulta médica no último mês?

(1) Consultas agendadas de HIV/aids para maiores de 13 anos: \_\_\_\_\_  
 (2) Não é possível obter esse dado

---

6. Quantos pacientes HIV/aids maiores de 13 anos **faltaram** às consultas médicas agendadas no último mês?

(1) Número de faltas em consultas médicas no último mês em HIV/aids \_\_\_\_\_  
 (2) Não é possível obter esse dado

---

7. Quantos dias por semana o ambulatório de HIV/aids está aberto ao público?

(1) 1 dia por semana  
 (2) 2 dias por semana

|                                                                                                                                                                                                                                                                                                                                                                                                                                                                                                                                                                                                                                                                                                                                                                                                                                                                                                                                                                                                             |
|-------------------------------------------------------------------------------------------------------------------------------------------------------------------------------------------------------------------------------------------------------------------------------------------------------------------------------------------------------------------------------------------------------------------------------------------------------------------------------------------------------------------------------------------------------------------------------------------------------------------------------------------------------------------------------------------------------------------------------------------------------------------------------------------------------------------------------------------------------------------------------------------------------------------------------------------------------------------------------------------------------------|
| <p>(3) 3 dias por semana<br/> (4) 4 dias por semana<br/> (5) 5 dias por semana<br/> (6) Mais de 5 dias por semana</p>                                                                                                                                                                                                                                                                                                                                                                                                                                                                                                                                                                                                                                                                                                                                                                                                                                                                                       |
| <p>8. Quantas horas por dia o ambulatório de HIV/aids está aberto ao público ?</p> <p>(1) 4 horas por dia<br/> (2) 6 horas por dia<br/> (3) 8 horas por dia<br/> (4) 12 horas por dia<br/> (5) Mais de 12 horas por dia</p>                                                                                                                                                                                                                                                                                                                                                                                                                                                                                                                                                                                                                                                                                                                                                                                 |
| <p>9. Em relação aos estágios e/ou capacitações <b>oferecidos</b> por esse serviço pode-se dizer que:</p> <div style="border: 1px solid black; padding: 5px; margin: 10px 0;"> <p><b>Considerar como capacitação as atividades de educação permanente que visem o fortalecimento e/ou descentralização das ações. Não considerar palestras para a população geral ou grupos populacionais.</b></p> </div> <p style="text-align: center;"><u><b>ASSINALE UMA OU MAIS ALTERNATIVAS</b></u></p> <p>(1) Não se aplica, pois esse serviço não realiza nem oferece campo para estágios e capacitações<br/> (2) São dirigidos a seus próprios alunos, porque esse serviço faz parte de uma instituição de ensino<br/> (3) São dirigidos a alunos/profissionais de outros serviços ou instituições, com supervisão de profissionais “externos”, vinculados a estas instituições<br/> (4) São dirigidos a alunos/profissionais de outras instituições, com supervisão de profissionais desse serviço de HIV/aids</p> |
| <p>10. Qual o número de consultórios e salas para atendimento?</p> <p>☞ <span style="border: 1px solid black; padding: 2px;">Quando a sala for ocupada com mais de uma finalidade contabilizá-la apenas 1 vez</span></p> <p>_____ Consultórios médicos<br/> _____ Salas para atendimento de enfermagem<br/> _____ Salas para atendimento individual por outros profissionais<br/> _____ Salas para atendimento em grupo</p>                                                                                                                                                                                                                                                                                                                                                                                                                                                                                                                                                                                 |
| <p>11. Em relação ao acesso pode-se afirmar que:</p> <p style="text-align: center;"><u><b>ASSINALE UMA OU MAIS ALTERNATIVAS</b></u></p> <p>(1) Esse serviço está localizado em região com fácil disponibilidade de transporte<br/> (2) Esse serviço está localizado em região de difícil acesso a transportes coletivos<br/> (3) O prédio tem planta física que facilita a circulação interna<br/> (4) Existem barreiras físicas nesse serviço como escadas e outros que dificultam a circulação interna</p>                                                                                                                                                                                                                                                                                                                                                                                                                                                                                                |
| <p>12. A demanda de rotina do ambulatório é atendida:</p> <p style="text-align: center;"><u><b>ASSINALE APENAS UMA ALTERNATIVA</b></u></p>                                                                                                                                                                                                                                                                                                                                                                                                                                                                                                                                                                                                                                                                                                                                                                                                                                                                  |

(1) Exclusivamente por médicos residentes ou estagiários  
 (2) A maior parte por médicos residentes  
 (3) A maior parte por médicos do próprio serviço  
 (4) Somente por médicos do próprio serviço

---

13. Quantos médicos responsáveis pelo seguimento ambulatorial de rotina a pacientes com HIV/aids existem nesse serviço?

✍

(1) Número de médicos infectologistas atendendo HIV/aids:  
 (2) Número de médicos clínicos atendendo HIV/aids:

---

14. Em relação ao **tempo médio de experiência em HIV/aids** dos médicos infectologistas e clínicos-gerais responsáveis pelo seguimento ambulatorial de rotina a pacientes com HIV/aids, pode-se dizer que:

**ASSINALE APENAS UMA ALTERNATIVA**

(1) Todos os médicos possuem 5 ou mais anos de experiência  
 (2) Todos os médicos possuem menos de 5 anos de experiência  
 (3) A maioria dos médicos da equipe possui mais de 5 anos de experiência  
 (4) A maioria dos médicos da equipe possui menos de 5 anos de experiência  
 (5) Há pelo menos 1 médico com 5 ou mais anos de experiência

---

15. Preencha os campos abaixo indicando a **carga horária contratada semanal** dos médicos infectologistas e clínicos-gerais responsáveis pelo seguimento ambulatorial de rotina a pacientes com HIV/aids.

(1) Carga horária total/semanal de infectologistas que atendem HIV/aids: \_\_\_\_\_  
 (2) Carga horária total/semanal de clínicos-gerais que atendem HIV/aids: \_\_\_\_\_

---

16. Caracterize a disponibilidade dos profissionais responsáveis pelo atendimento ambulatorial de **ROTINA** dos pacientes com HIV/aids conforme quadro abaixo:

✍ na coluna A coloque o número de profissionais que atendem pacientes com HIV/aids por categoria  
 ✍ enumere nas colunas B e C quantos profissionais são exclusivos para atendimento a pacientes com HIV/aids e quantos não o são.

| Áreas de especialidade | Número total de Profissionais | Número de profissionais que atendem HIV/aids segundo a exclusividade |                              |
|------------------------|-------------------------------|----------------------------------------------------------------------|------------------------------|
|                        |                               | B<br>N.º Prof. Exclusivos                                            | C<br>N.º Prof não exclusivos |
| (1) Enfermeiro         |                               |                                                                      |                              |
| (2) Psicólogo          |                               |                                                                      |                              |

|                                    |  |  |  |
|------------------------------------|--|--|--|
| (3) Dentista                       |  |  |  |
| (4) Farmacêutico                   |  |  |  |
| (5) Assist. social                 |  |  |  |
| (6) Auxiliar/técnico de enfermagem |  |  |  |

## II. Sistema de registro e informações

17. Os prontuários dos pacientes com HIV/aids:

**ASSINALE UMA OU MAIS ALTERNATIVAS**

- (1) São arquivados junto com os demais prontuários desse serviço (arquivo único)
- (2) São arquivados separadamente (em arquivo exclusivo desses pacientes)
- (3) São utilizados por todos os setores de assistência desse serviço (prontuário único)
- (4) São utilizados apenas pelos profissionais da equipe que acompanha os pacientes de HIV/aids
- (5) Outros

18. O registro do conteúdo da assistência prestada (história, condutas etc.) por profissional de nível universitário não-médico (psicólogo, assistente social, enfermeiro etc.) é realizado:

**ASSINALE UMA OU MAIS ALTERNATIVAS**

- (1) No prontuário do paciente (prontuário único)
- (2) Em livros ou fichas separadas
- (3) Esse tipo de registro não é feito

19. Assinale as informações que possuem registro sistemático nesse serviço:

**ATENÇÃO:** os itens de 1 a 9 são informações sobre procedimentos/ações e a partir do item 10 são relacionadas a pacientes.

**ASSINALE UMA OU MAIS ALTERNATIVAS**

- (1) Número de atendimentos e procedimentos
- (2) Número de consultas por faixa etária
- (3) Número de consultas por diagnóstico (infecções oportunistas/outras DSTs)
- (4) Número de consultas por médicos
- (5) Número de atendimentos em grupo
- (6) Atendimentos a casos de exposição ocupacional
- (7) Número total de faltas em consulta médica
- (8) Número de faltas por paciente em consulta médica
- (9) Número de exames laboratoriais realizados
- (10) Número de pacientes por faixa etária
- (11) Número de pacientes por sexo
- (12) Número de pacientes soropositivos

|                                                                                                                                                                                                                                                                                                                                                                                                                                                                                                                                                                                                                                                                                                                                                           |
|-----------------------------------------------------------------------------------------------------------------------------------------------------------------------------------------------------------------------------------------------------------------------------------------------------------------------------------------------------------------------------------------------------------------------------------------------------------------------------------------------------------------------------------------------------------------------------------------------------------------------------------------------------------------------------------------------------------------------------------------------------------|
| <p>(13)Número de pacientes com co-infecção por tuberculose</p> <p>(14)Número de pacientes por diagnóstico (infecções oportunistas, outras DSTs)</p> <p>(15)Número de pacientes em uso de anti-retroviral</p> <p>(16)Primeiro atendimento no ano de cada paciente</p> <p>(17)Número de óbitos</p> <p>(18)Número de pacientes por esquema terapêutico com anti-retroviral</p> <p>(19)Outros</p>                                                                                                                                                                                                                                                                                                                                                             |
| <p>20. No atendimento médico, o registro é feito:</p> <p style="text-align: center;"><b><u>ASSINALE APENAS UMA ALTERNATIVA</u></b></p> <p>(1) Livremente em folhas em branco, a critério do profissional</p> <p>(2) Em campos padronizados para preenchimento somente na 1ª consulta</p> <p>(3) Em campos padronizados para preenchimento em todas as consultas</p>                                                                                                                                                                                                                                                                                                                                                                                       |
| <p>21. Em que outros atendimentos são utilizados formulários padronizados?</p> <p style="text-align: center;"><b><u>ASSINALE UMA OU MAIS ALTERNATIVAS</u></b></p> <p>(1) No primeiro atendimento do paciente nesse serviço por profissional não-médico</p> <p>(2) No atendimento de enfermagem</p> <p>(3) No atendimento odontológico</p> <p>(4) No atendimento com nutricionista</p> <p>(5) No atendimento psicológico</p> <p>(6) No atendimento em serviço social</p> <p>(7) No atendimento em grupo</p> <p>(8) No atendimento a casos de exposição ocupacional</p> <p>(9) No atendimento de gestantes</p> <p>(10)No atendimento de DST</p> <p>(11)No atendimento de Tuberculose</p> <p>(12)Outros</p> <p>(13)Não são usados registros padronizados</p> |
| <p>22. De rotina, o preenchimento das fichas de notificação epidemiológica é realizado pelo seguinte profissional:</p> <p style="text-align: center;"><b><u>ASSINALE UMA OU MAIS ALTERNATIVAS</u></b></p> <p>(1) Enfermeira</p> <p>(2) Auxiliar/técnico de enfermagem</p> <p>(3) Profissional administrativo</p> <p>(4) Médico</p> <p>(5) Outro profissional de nível universitário</p> <p>(6) O médico preenche a parte clínica e outro profissional preenche o restante</p> <p>(7) O enfermeiro preenche a parte clínica e outro profissional preenche o restante</p>                                                                                                                                                                                   |

(8) Não é realizado por esse serviço

### III. Captação da demanda e primeiro atendimento de pacientes HIV/Aids

23. Quando o teste diagnóstico do HIV é oferecido nesse serviço, a orientação e o aconselhamento **pré-teste** são realizados:

**ASSINALE UMA OU MAIS ALTERNATIVAS**

- (1) Em grupo por profissional de nível médio (auxiliar/técnico)
- (2) Em grupo por profissional de nível universitário
- (3) Individualmente por profissional de nível médio (auxiliar/técnico)
- (4) Individualmente por profissional de nível universitário
- (5) O aconselhamento não é realizado
- (6) O teste não é oferecido nesse serviço

24. A orientação e o aconselhamento **pós-teste**, quando realizados nesse serviço, são feitos por quais profissionais?

**ASSINALE UMA OU MAIS ALTERNATIVAS**

- (1) Profissional de nível médio (auxiliar/técnico)
- (2) Profissional de nível universitário
- (3) A orientação e o acompanhamento pós-teste não são realizados

25. Caso o paciente com sorologia positiva confirmada não retornar a esse serviço:

**ASSINALE APENAS UMA ALTERNATIVA**

- (1) Aguarda o retorno espontâneo
- (2) Convoca, tendo o cuidado de não quebrar o sigilo
- (3) Convoca, apenas se for gestante, tendo o cuidado de não quebrar o sigilo
- (4) Não se aplica, pois a testagem é anônima
- (5) Não se aplica, pois esse serviço não oferece exame

26. Os pacientes que procuram atendimento pela primeira vez nesse serviço são **de rotina**:

**ASSINALE APENAS UMA ALTERNATIVA**

- (1) Atendidos no mesmo dia por profissional não-médico de nível universitário
- (2) Atendidos no mesmo dia por profissional de nível médio (auxiliar/técnico) da área de enfermagem e, se necessário, por consulta médica
- (3) Atendidos no mesmo dia por profissional não-médico de nível universitário e, se necessário, por consulta médica
- (4) Atendidos no mesmo dia por profissional não-médico de nível universitário e por consulta médica
- (5) Atendidos em consulta médica no mesmo dia
- (6) Agendados para outro dia para atendimento com profissional não-médico de nível universitário

(7) Agendados para outro dia para consulta médica

(8) Orientados a retornar nos dias subsequentes para tentar vaga para consulta médica

(9) Outros



27. Nesse primeiro atendimento, as atividades realizadas são:

**ASSINALE UMA OU MAIS ALTERNATIVAS**

- (1) Apresentação do serviço e de seu funcionamento
- (2) Investigação sobre categoria de exposição
- (3) Entrega de preservativos
- (4) Triagem da área de moradia
- (5) Avaliação de gravidade clínica
- (6) Solicitação de exames
- (7) Agendamento de consulta médica
- (8) Orientação sobre formas de transmissão e métodos/práticas de prevenção
- (9) Investigação e orientação sobre parceria sexual
- (10) Investigação de tempo de diagnóstico
- (11) Investigação sobre o uso anterior de anti-retroviral
- (12) Outros

28. Quando o paciente de HIV/aids não é matriculado nesse serviço, na maioria das vezes ele é:

**ASSINALE APENAS UMA ALTERNATIVA**

- (1) Encaminhado verbalmente para outro serviço
- (2) Encaminhado com guia/carta para outro serviço
- (3) Encaminhado com guia/carta para outro serviço após contato e/ou agendamento
- (4) Não se aplica, pois todos os casos são absorvidos por esse serviço

29. Após o primeiro atendimento, o paciente sai desse serviço com a consulta de retorno agendada?

- (1) Não
- (2) Sim

30. Qual o intervalo **médio de tempo** entre o primeiro atendimento nesse serviço e a primeira consulta médica de HIV/aids (excluindo os casos graves)?

**ASSINALE APENAS UMA ALTERNATIVA**

- (1) O primeiro atendimento sempre é a primeira consulta
- (2) Menos de 1 semana
- (3) De 1 a 4 semanas
- (4) De 5 a 8 semanas
- (5) Mais de 8 semanas

#### IV. Organização geral da assistência às pessoas que vivem com HIV/Aids

31. Quando chega a esse serviço, o paciente com consulta marcada com o médico:

**ASSINALE APENAS UMA ALTERNATIVA**

- (1) Passa antes por atendimento com auxiliar/técnico de enfermagem
- (2) Passa antes por atendimento com o enfermeiro
- (3) Passa por atendimento prévio ao do médico com outro profissional de nível superior
- (4) Passa em consulta médica sem nenhum outro atendimento prévio
- (5) Passa por atendimento prévio ao do médico dependendo da necessidade do paciente
- (6) Outros

32. Quando existe pré-consulta de rotina (atendimento realizado pela enfermagem, antes da consulta médica), sua finalidade é:

**ASSINALE UMA OU MAIS ALTERNATIVAS**

- (1) Aferir peso e/ou pressão arterial
- (2) Verificar queixas agudas e definir prioridades de atendimento
- (3) Fornecer preservativos
- (4) Verificar a adesão aos anti-retrovirais
- (5) Outros
- (6) Não se aplica, pois a pré-consulta não é realizada

33. São realizadas atividades com os pacientes na sala de espera?

**ASSINALE UMA OU MAIS ALTERNATIVAS**

- (1) Habitualmente não
- (2) Sim, através da discussão de temas propostos pelos pacientes
- (3) Sim, habitualmente são passados vídeos educativos
- (4) Sim, habitualmente são realizadas palestras
- (5) Outros

34. As consultas médicas são agendadas:

**ASSINALE APENAS UMA ALTERNATIVA**

- (1) Com hora marcada para cada paciente
- (2) Por grupos de pacientes por hora (por bloco)
- (3) Todos os pacientes no início do turno
- (4) Para cada médico existe uma rotina
- (5) As consultas não são agendadas antecipadamente

35. Quantas consultas são previstas por período de 4 horas de trabalho para **cada** infectologista e/ou clínico (agendadas e extras)?

**ASSINALE APENAS UMA ALTERNATIVA**

- (1) Menos de 8 consultas
- (2) 8 consultas
- (3) 10 consultas
- (4) 12 consultas
- (5) 16 consultas
- (6) 20 consultas
- (7) acima de 20 consultas

36. O número de consultas médicas para **casos novos** é pré-estabelecido para cada médico por período?

- (1) Não
- (2) Sim

37. Nas consultas de **retorno**, o mais freqüente é que o paciente seja agendado:

**ASSINALE APENAS UMA ALTERNATIVA**

- (1) Para o mesmo profissional
- (2) Para o profissional com agenda disponível
- (3) Com o médico responsável, mas para atendimento com diferentes estagiários (alunos ou residentes)
- (4) O retorno não é agendado. O paciente é orientado a retornar em período estabelecido pelo médico ou pela rotina desse serviço
- (5) Outros

38. Qual a forma de acesso ao atendimento **odontológico** nesse serviço?

**ASSINALE UMA OU MAIS ALTERNATIVAS**

- (1) Agendamento conforme demanda do paciente
- (2) Agendamento de avaliação periódica mesmo na ausência de queixas
- (3) Pronto atendimento para queixas agudas
- (4) Não há atendimento odontológico nesse serviço

39. Para as mulheres, qual a forma de acesso predominante ao atendimento médico **ginecológico** nesse serviço?

**ASSINALE UMA OU MAIS ALTERNATIVAS**

- (1) Agendamento conforme demanda do paciente
- (2) Agendamento de avaliação periódica mesmo na ausência de queixas
- (3) Pronto atendimento para queixas agudas
- (4) Não há rotina
- (5) Não há ginecologista nesse serviço

40. Esse serviço possui padronizações de condutas (protocolos)?

**ASSINALE UMA OU MAIS ALTERNATIVAS**

- (1) Sim, no primeiro atendimento nesse serviço
- (2) Sim, na consulta médica inicial
- (3) Sim, na consulta médica de retorno
- (4) Sim, no atendimento por outros profissionais de nível universitário
- (5) Sim, no atendimento a condições específicas (como co-infecção HIV/tuberculose, gestantes, acidentes de trabalho e outros)
- (6) Outros
- (7) Não há padronizações para as atividades da assistência

41. No caso de existirem padronizações, como foram elaboradas?

**ASSINALE UMA OU MAIS ALTERNATIVAS**

- (1) Pelos profissionais desse serviço
- (2) Foram adaptadas da experiência de outros serviços
- (3) Por outras instâncias do Programa de DST/Aids
- (4) Outros
- (5) Não existem padronizações

## V. Seguimento ambulatorial de rotina de pacientes HIV/Aids

42. Qual o **tempo médio** de duração da consulta do infectologista e/ou clínico para **consultas de casos novos** ?

**ASSINALE APENAS UMA ALTERNATIVA**

- (1) 15 minutos
- (2) 30 minutos
- (3) 45 minutos
- (4) 60 minutos

43. Qual o **tempo médio** de duração do atendimento do infectologista e/ou clínico para **consultas de retorno**?

**ASSINALE APENAS UMA ALTERNATIVA**

- (1) 15 minutos
- (2) 30 minutos
- (3) 45 minutos
- (4) 60 minutos

44. Durante a **consulta médica** de seguimento, **além dos procedimentos técnicos de rotina**, o médico:

**ASSINALE UMA OU MAIS ALTERNATIVAS**

- (1) Preenche os formulários para dispensação de anti-retrovirais
- (2) Investiga as dificuldades no uso de anti-retrovirais
- (3) Orienta resumidamente a medicação
- (4) Encaminha para outro profissional para orientação detalhada da medicação
- (5) Orienta detalhadamente o uso de medicação
- (6) Orienta o uso de preservativo
- (7) Orienta o paciente sobre concepção/contracepção
- (8) Orienta sobre exposição acidental entre pares discordantes
- (9) Aborda questões relativas à sexualidade
- (10) Agenda pessoalmente o retorno
- (11) Faz outras orientações ou procedimentos
- (12) Encaminha para outros atendimentos

45. Para os pacientes que **não estão em uso** de anti-retroviral, qual é o intervalo **médio** entre as consultas?

**ASSINALE APENAS UMA ALTERNATIVA**

- (1) 30 dias
- (2) 60 dias
- (3) 90 dias

- (4) 120 dias
- (5) acima de 120 dias

46. Para os pacientes **em uso** de anti-retroviral, Qual é o intervalo **médio** entre as consultas de rotina?

**ASSINALE APENAS UMA ALTERNATIVA**

- (1) 30 dias
- (2) 60 dias
- (3) 90 dias
- (4) acima de 90 dias

47. Qual o intervalo de rotina para o retorno em consulta médica ou com profissional de nível superior quando é **introduzida** a terapia anti-retroviral nesse serviço?

**ASSINALE APENAS UMA ALTERNATIVA**

- (1) 7 dias
- (2) 15 dias
- (3) 30 dias
- (4) 60 dias
- (5) Não existe uma rotina diferente no início da terapia anti-retroviral

48. Para os pacientes em seguimento, o uso correto da medicação geralmente é verificado através de:

**ASSINALE UMA OU MAIS ALTERNATIVAS**

- (1) Questionamento sobre o uso correto
- (2) Checagem de rotina em consulta médica sobre dificuldades com efeitos colaterais e posologia (horários e alimentação)
- (3) Checagem de rotina sobre dificuldades relativas ao dia a dia (trabalho, fins de semana, festas etc.)
- (4) Contagem dos medicamentos que sobraram
- (5) Recordatório detalhado sobre as atividades diárias do paciente e o uso da medicação
- (6) Checagem de anotações do paciente sobre o modo de uso diário, em caderno ou formulário específico
- (7) Grupo de adesão
- (8) Outros

49. Qual o mecanismo utilizado para garantir acesso aos anti-retrovirais quando o agendamento de rotina prevê um intervalo entre as consultas **de mais de 30 dias**?

**ASSINALE APENAS UMA ALTERNATIVA**

- (1) Quando o paciente está estável leva prescrição para 60 dias
- (2) A enfermeira ou o farmacêutico autoriza a retirada da medicação

- (3) O paciente passa por consulta de enfermagem e, após orientações, retira a medicação previamente prescrita
- (4) O paciente passa por atendimento com farmacêutico e, após orientações retira a medicação previamente prescrita
- (5) O médico deixa prescrição pronta no serviço para o próximo mês
- (6) O paciente sempre leva prescrição para 60 dias
- (7) Isso não acontece

50. Quando um paciente apresenta dificuldades no tratamento com anti-retroviral:

**ASSINALE UMA OU MAIS ALTERNATIVAS**

- (1) O retorno é realizado em intervalos menores
- (2) O paciente é encaminhado para grupos de adesão
- (3) O paciente é encaminhado para orientação individual com profissional de nível superior
- (4) Há mudança de esquema terapêutico, se possível
- (5) Há reforço da importância da adesão nas consultas médicas
- (6) Outros

51. No caso do paciente ficar sem medicação, por razões imprevistas, ele é orientado a:

**ASSINALE APENAS UMA ALTERNATIVA**

- (1) Agendar consulta médica
- (2) Passar em consulta extra (encaixe na agenda ou pronto atendimento)
- (3) Pegar receita com enfermagem ou farmacêutico até a próxima consulta
- (4) Outros

52. A pós-consulta (atendimento de enfermagem após o atendimento médico) é realizada com a finalidade de:

**ASSINALE UMA OU MAIS ALTERNATIVAS**

- (1) Agendar retorno
- (2) Agendar exames
- (3) Orientar uso de medicação
- (4) Fornecer preservativos
- (5) Orientar uso de preservativos
- (6) Orientar encaminhamentos para outros serviços
- (7) Orientar encaminhamentos para benefícios sociais
- (8) Orientar sobre direitos civis
- (9) Outros
- (10) Não há pós-consulta



53. Em relação ao desejo de ter filhos por parte das pessoas que vivem com HIV/aids (homens e mulheres), os profissionais desse serviço:

**ASSINALE UMA OU MAIS ALTERNATIVAS**

- (1) Não recomendam a concepção devido aos riscos para a saúde da mulher soropositiva
- (2) Não recomendam a concepção devido ao risco de transmissão vertical
- (3) Orientam sobre os riscos e discutem o melhor momento para a concepção
- (4) Não recomendam a concepção, mas se a mulher engravidar, fazem o acompanhamento

54. Quando o paciente falta ao atendimento agendado, esse serviço:

**ASSINALE UMA OU MAIS ALTERNATIVAS**

- (1) Aguarda retorno espontâneo em todos os casos
- (2) Convoca paciente em uso de anti-retroviral
- (3) Convoca os casos com maior gravidade clínica
- (4) Convoca quando é caracterizado o abandono
- (5) Convoca os casos que apresentam exames alterados
- (6) Convoca todos os faltosos
- (7) Outros
- (8) Não se aplica, pois esse serviço não faz controle de faltosos.
- (9) Não se aplica, pois esse serviço não trabalha com agendamento

55. Para os pacientes em uso de anti-retroviral, qual o critério de abandono utilizado por esse serviço?

**ASSINALE UMA OU MAIS ALTERNATIVAS**

- (1) Duas faltas consecutivas na consulta médica (não importando o intervalo de tempo entre as consultas)
- (2) 3 ou mais faltas consecutivas na consulta médica
- (3) 2 meses de ausência no serviço
- (4) De 3 a 5 meses de ausência no serviço
- (5) 6 meses ou mais de ausência no serviço
- (6) Após convocação sem comparecimento
- (7) Outros
- (8) Não há critério de abandono

56. Esse serviço faz controle do número de óbitos entre seus pacientes?

**ASSINALE UMA OU MAIS ALTERNATIVAS**

- (1) Não de modo sistemático
- (2) Sim, sempre que a família avisa
- (3) Sim, através de informação proveniente do serviço de epidemiologia

- (4) Sim, esse serviço busca sistematicamente a informação em outros órgãos (por exemplo: veículos de comunicação, registros de óbitos do município, velórios e outros)

## VI. Atendimento não agendado de pacientes HIV/Aids

57. De que maneira esse serviço soluciona o atendimento de pacientes “extras” ou não agendados?

**ASSINALE UMA OU MAIS ALTERNATIVAS**

- (1) Há reserva de vagas na agenda dos médicos
- (2) Os médicos do ambulatório fazem escala para atendimento desses pacientes
- (3) Os pacientes são atendidos na dependência de vaga nas agendas médicas
- (4) Esse serviço dispõe de médico(s) específico(s) para pronto atendimento a pacientes HIV/aids
- (5) Os pacientes são encaminhados para atendimento em Pronto Socorro não específico para pacientes HIV/aids
- (6) Os pacientes são sempre atendidos, independentemente da existência de vagas na agenda
- (7) Outros

58. Qual a demanda mais freqüente para os atendimentos “extras” (consultas não agendadas para pacientes em seguimento)?

**ASSINALE APENAS UMA ALTERNATIVA**

- (1) Intercorrências clínicas
- (2) Término da medicação
- (3) Falta à última consulta agendada
- (4) Abandono de tratamento
- (5) Resposta à convocação
- (6) Fornecimento de atestado para benefícios sociais
- (7) Não é possível obter essas informações
- (8) O atendimento extra não é realizado
- (9) Esse serviço não trabalha com agendamento prévio

59. Quais atividades são realizadas rotineiramente no atendimento “extra” ou não agendado:

**ASSINALE UMA OU MAIS ALTERNATIVAS**

- (1) Avaliação de queixas clínicas
- (2) Fornecimento de receita de anti-retroviral e outras medicações, quando necessário
- (3) Avaliação e reorientação do uso de anti-retroviral e outras medicações
- (4) Solicitação de exames
- (5) Verificação da ocorrência de faltas anteriores
- (6) Orientação sobre retorno para o atendimento de rotina
- (7) Identificação das dificuldades em comparecer aos atendimentos agendados
- (8) Fornecimento de atestado para benefício social
- (9) Outros
- (10) O atendimento "extra" não é realizado

## VII. Características da assistência prestada pela equipe multiprofissional

60. Durante o atendimento, quais atividades são realizadas de rotina pelo **auxiliar/técnico de enfermagem**?

ASSINALE UMA OU MAIS ALTERNATIVAS

- (1) Agendamento de exames e consultas
- (2) Verificação de sinais vitais – peso, altura, temperatura, pressão arterial
- (3) Verificação de queixas agudas que exijam providências
- (4) Conferência do prontuário e do motivo do atendimento – resultados de exames etc.
- (5) Orientação sobre o uso de preservativos
- (6) Distribuição de preservativos
- (7) Orientação para coleta de exames
- (8) Orientação sobre o uso da medicação
- (9) Discussão sobre as dificuldades de adesão
- (10) Orientações nutricionais e dietéticas
- (11) Grupos de adesão ou grupos sobre outros temas específicos
- (12) Orientação sobre encaminhamentos para especialistas
- (13) Coleta de sangue para exames laboratoriais
- (14) Outros
- (15) Esse serviço não dispõe desse profissional

61. Quais atividades são realizadas pelo **enfermeiro**?

ASSINALE UMA OU MAIS ALTERNATIVAS

- (1) Recepção e acolhimento de casos novos
- (2) Triage de intercorrências
- (3) Realização de grupos de adesão
- (4) Realização de grupos sobre outros temas específicos
- (5) Notificação epidemiológica
- (6) Supervisão da equipe de enfermagem
- (7) Visita domiciliar
- (8) Outros
- (9) Esse serviço não dispõe desse profissional

62. Na **consulta de enfermagem** (atendimento individual pelo enfermeiro) é realizado:

**ASSINALE UMA OU MAIS ALTERNATIVAS**

- (1) Orientação sobre uso correto de medicação
- (2) Discussão sobre adesão
- (3) Orientação sobre as formas de transmissão e cuidados domésticos (biossegurança)
- (4) Orientação sobre uso de preservativos
- (5) Orientação sobre concepção / contracepção
- (6) Atendimento às DST (abordagem sindrômica)
- (7) Atendimento aos casos de exposição ocupacional
- (8) Outros
- (9) O enfermeiro não realiza consulta de enfermagem
- (10) Esse serviço não dispõe desse profissional

63. Quais atividades são realizadas pelo **psicólogo**?

**ASSINALE UMA OU MAIS ALTERNATIVAS**

- (1) Recepção e acolhimento de casos novos
- (2) Atendimento conjunto com médico e/ou serviço social
- (3) Psicoterapia individual
- (4) Psicoterapia de grupo
- (5) Suporte para a equipe técnica desse serviço
- (6) Triage de intercorrências
- (7) Grupos de adesão
- (8) Grupos sobre outros temas específicos
- (9) Visita domiciliar
- (10) Atendimento e suporte para a família
- (11) Outros
- (12) Esse serviço não dispõe desse profissional

64. Quais atividades são realizadas pelo **assistente social**?

**ASSINALE UMA OU MAIS ALTERNATIVAS**

- (1) Recepção e acolhimento de casos novos
- (2) Discussão e apoio sobre estrutura familiar
- (3) Discussão e orientação sobre questões trabalhistas
- (4) Orientação sobre direitos civis e previdenciários
- (5) Encaminhamentos para benefícios sociais (cesta básica, vale transporte etc.)
- (6) Grupos de adesão
- (7) Grupos sobre outros temas específicos
- (8) Controle de faltosos e/ou busca ativa
- (9) Atividades de reinserção social e/ou geração de renda

- (10) Visita domiciliar
- (11) Outros
- (12) Esse serviço não dispõe desse profissional

65. As atribuições do **farmacêutico** são:

**ASSINALE UMA OU MAIS ALTERNATIVAS**

- (1) Controle do suprimento e dispensação dos medicamentos
- (2) Treinamento e supervisão dos auxiliares de farmácia (ou dos outros profissionais que auxiliam na farmácia)
- (3) Dispensação de medicamentos
- (4) Orientação individual dos pacientes quanto ao uso da medicação
- (5) Supervisão e orientação da equipe médica sobre a adequação dos esquemas com anti-retroviral
- (6) Controle de faltosos
- (7) Grupos de adesão
- (8) Outros
- (9) Esse serviço não dispõe desse profissional

66. Como os diferentes profissionais da equipe atendem e encaminham os pacientes?

**ASSINALE UMA OU MAIS ALTERNATIVAS**

- (1) O médico identifica as necessidades e encaminha para os diferentes profissionais (psicólogos, assistentes sociais e outros) ou para outras instituições
- (2) Todos os profissionais encaminham para todos da equipe
- (3) Os pacientes são obrigatoriamente atendidos, pelo menos uma vez, pelos diferentes profissionais da equipe básica (médico, psicólogo, assistente social e enfermeiro)
- (4) Não existem outros profissionais com nível universitário além do médico

### VIII. Medicamentos

67. Classifique os medicamentos abaixo com relação a sua disponibilidade nos últimos 6 meses:

**NÃO DISPONÍVEL:** não padronizado pelo município ou não adquirido há pelo menos 6 meses

**NÃO UTILIZADO:** não há demanda em razão do perfil clínico-imunológico dos pacientes

**MARCAR UMA ALTERNATIVA POR MEDICAMENTO**

| Medicamentos     | Não utilizado | Não disponível | Não faltou | Faltou: tempo médio de falta nos últimos 6 meses |                 |                    |
|------------------|---------------|----------------|------------|--------------------------------------------------|-----------------|--------------------|
|                  | A             | B              | C          | D) Até 15 dias                                   | E) 16 a 30 dias | F) Mais de 30 dias |
| (1) Azitromicina |               |                |            |                                                  |                 |                    |
| (2) Dapsona      |               |                |            |                                                  |                 |                    |

|     |                                |  |  |  |  |  |
|-----|--------------------------------|--|--|--|--|--|
| (3) | Sulfadiazina                   |  |  |  |  |  |
| (4) | Sulfametoxazol-<br>Trimetoprim |  |  |  |  |  |
| (5) | Cetoconazol                    |  |  |  |  |  |
| (6) | Fluconazol                     |  |  |  |  |  |
| (7) | Aciclovir comp.                |  |  |  |  |  |
| (8) | Pirimetamina                   |  |  |  |  |  |

68. Nesse serviço a orientação do uso de anti-retroviral é realizada:

**ASSINALE UMA OU MAIS ALTERNATIVAS**

- (1) Na consulta médica
- (2) Por auxiliar/técnico de enfermagem
- (3) Na farmácia, por farmacêutico ou pessoal auxiliar
- (4) Na consulta do farmacêutico
- (5) Na consulta do enfermeiro
- (6) No atendimento individual por outros profissionais de nível superior
- (7) Nos grupos de discussão sobre adesão

69. Nesse serviço, a dispensação de anti-retroviral na **primeira prescrição** é feita:

**ASSINALE APENAS UMA ALTERNATIVA**

- (1) No mesmo dia
- (2) Até 7 dias após a prescrição
- (3) De 8 a 15 dias após a prescrição
- (4) De 16 a 30 dias após a prescrição
- (5) Acima de 30 dias após a prescrição
- (6) Esse serviço não tem acesso a essa informação

70. O controle da dispensação de medicamentos é feito através de:

**ASSINALE UMA OU MAIS ALTERNATIVAS**

- (1) Ficha de cadastro individual, com informações sobre esquema Terapêutico e data da retirada
- (2) SICLOM (Sistema de Informação e Controle de Logística de Medicamento)
- (3) Retenção da 2ª via da receita médica
- (4) Fichas de prateleira para controle de estoque de medicamentos
- (5) Livro de registro
- (6) Planilha de controle de medicamentos
- (7) Outros
- (8) Esse serviço não tem esse tipo de controle



71. Ao realizar o controle de dispensação dos anti-retrovirais, este serviço retira os óbitos notificados, de forma a atualizar as informações sobre o número de pacientes em uso de anti-retrovirais?

(1) Não

(2) Sim

Não se aplica, pois esse serviço não dispensa anti-retroviral

72. Classifique os anti-retrovirais abaixo com relação a sua disponibilidade nos últimos 6 meses:

**MARCAR UMA ALTERNATIVA POR MEDICAMENTO**

| Medicamentos                                 | Não Disponível / Não utilizado | Não faltou | Faltou: Tempo médio de falta nos últimos 6 meses |                   |                    |                       |
|----------------------------------------------|--------------------------------|------------|--------------------------------------------------|-------------------|--------------------|-----------------------|
|                                              | A                              | B          | C)<br>Até 7 dias                                 | D)<br>8 a 15 dias | E)<br>16 a 30 dias | F)<br>mais de 30 dias |
| (1) Abacavir (ABV) comp. 300mg               |                                |            |                                                  |                   |                    |                       |
| (2) Amprenavir (AMP) comp. 150mg             |                                |            |                                                  |                   |                    |                       |
| (3) Atazanavir (ATZ) comp. 150mg             |                                |            |                                                  |                   |                    |                       |
| (4) Atazanavir (ATZ) comp. 200mg             |                                |            |                                                  |                   |                    |                       |
| (5) Didanosina (ddl) comp.100mg              |                                |            |                                                  |                   |                    |                       |
| (6) Didanosina (ddl) comp.25mg               |                                |            |                                                  |                   |                    |                       |
| (7) Didanosina EC comp.400mg                 |                                |            |                                                  |                   |                    |                       |
| (8) Didanosina EC comp.250mg                 |                                |            |                                                  |                   |                    |                       |
| (9) Efavirenz (EFV) caps. 600mg              |                                |            |                                                  |                   |                    |                       |
| (10) Enfuvirtida (T20) fr.amp.90mg           |                                |            |                                                  |                   |                    |                       |
| (11) Estavudina (D4T) comp 30 mg             |                                |            |                                                  |                   |                    |                       |
| (12) Estavudina (D4T) comp 40mg              |                                |            |                                                  |                   |                    |                       |
| (13) Indinavir (INV) comp. 400mg             |                                |            |                                                  |                   |                    |                       |
| (14) Lamivudina (3TC) comp.150mg             |                                |            |                                                  |                   |                    |                       |
| (15) Lopinavir/r (LPV) comp. 133mg           |                                |            |                                                  |                   |                    |                       |
| (16) Nelfinavir (NFV) caps. 250mg            |                                |            |                                                  |                   |                    |                       |
| (17) Nevirapina (NPV) caps. 200mg            |                                |            |                                                  |                   |                    |                       |
| (18) Ritonavir (RTV) comp.100mg              |                                |            |                                                  |                   |                    |                       |
| (19) Saquinavir (SQV) cps. duras 200mg       |                                |            |                                                  |                   |                    |                       |
| (20) Saquinavir (SQV) cps. gelatinosas 200mg |                                |            |                                                  |                   |                    |                       |
| (21) Tenofovir (TFD) comp. 300mg             |                                |            |                                                  |                   |                    |                       |
| (22) Zidovudina (AZT) comp. 100mg            |                                |            |                                                  |                   |                    |                       |
| (23) Zidovudina (AZT) suspensão              |                                |            |                                                  |                   |                    |                       |

|                                             |  |  |  |  |  |  |
|---------------------------------------------|--|--|--|--|--|--|
| (24) Zidovudina ( AZT) injetável            |  |  |  |  |  |  |
| (25) Zidovudina 300mg + Lamivudina<br>150mg |  |  |  |  |  |  |

( ) Esse serviço não possui essas informações

73. **Caso esse serviço não dispense** anti-retrovirais, a dispensação na unidade de referência:

**ASSINALE UMA OU MAIS ALTERNATIVAS**

- (1) É demorada devido à falta freqüente de medicação
- (2) É demorada devido às exigências burocráticas
- (3) É demorada devido dificuldade de acesso (outra cidade, bairros afastados)
- (4) A dispensação supre as necessidades desse serviço
- (5) Não é possível informar porque não há integração com a unidade dispensadora.
- (6) Não se aplica, pois esse serviço dispensa anti-retroviral

## IX. Apoio diagnóstico e terapêutico

74. Com relação ao acesso às modalidades assistenciais dirigidas ao cuidado dos pacientes com HIV/aids, esse serviço dispõe:

**(ESCOLHA UMA ALTERNATIVA POR LINHA)**

| Modalidade Assistencial      | Disponível nesse serviço (A) | Disponível fora desse serviço |                     | Não disponível (D) |
|------------------------------|------------------------------|-------------------------------|---------------------|--------------------|
|                              |                              | Com facilidade (B)            | Com dificuldade (C) |                    |
| (1) CTA/COAS                 |                              |                               |                     |                    |
| (2) ADT                      |                              |                               |                     |                    |
| (3) HD- Hospital Dia         |                              |                               |                     |                    |
| (4) Internação convencional  |                              |                               |                     |                    |
| (5) Pronto Socorro (24horas) |                              |                               |                     |                    |

75. Quanto aos exames laboratoriais, esse serviço:

**ASSINALE APENAS UMA ALTERNATIVA**

- (1) Coleta todos os exames
- (2) Coleta parte dos exames no serviço e encaminha outros para coleta em laboratório de referência
- (3) Encaminha todos os exames para coleta em laboratório de referência

76. Caracterize a disponibilidade de exames, assinalando o **tempo médio** de espera para o resultado

**ESCOLHA UMA ALTERNATIVA POR EXAME**

**CONSIDERE O TEMPO A PARTIR DA SOLICITAÇÃO DO EXAME**

**CONSIDERAR A DISPONIBILIDADE INDEPENDENTEMENTE DO EXAME SER REALIZADO DENTRO OU FORA DESSE SERVIÇO**

| EXAMES                  | Não disponível | Disponível com tempo médio de espera para o resultado de: |                   |                    |                    |                       |                    |
|-------------------------|----------------|-----------------------------------------------------------|-------------------|--------------------|--------------------|-----------------------|--------------------|
|                         | A)             | B)<br>até 7 dias                                          | C)<br>8 a 15 dias | D)<br>16 a 30 dias | E)<br>31 a 45 dias | F)<br>46 dias ou mais | G)<br>Imprevisível |
| (1) Amilase             |                |                                                           |                   |                    |                    |                       |                    |
| (2) Bilirrubina/frações |                |                                                           |                   |                    |                    |                       |                    |

|                                                             |  |  |  |  |  |  |  |
|-------------------------------------------------------------|--|--|--|--|--|--|--|
| (3) Colesterol                                              |  |  |  |  |  |  |  |
| (4) Creatinina                                              |  |  |  |  |  |  |  |
| (5) Glicose                                                 |  |  |  |  |  |  |  |
| (6) TGO/TGP                                                 |  |  |  |  |  |  |  |
| (7) Uréia                                                   |  |  |  |  |  |  |  |
| (8) Triglicérides                                           |  |  |  |  |  |  |  |
| (9) Hemograma                                               |  |  |  |  |  |  |  |
| (10) Hemocultura Bactéria                                   |  |  |  |  |  |  |  |
| (11) Coprocultura                                           |  |  |  |  |  |  |  |
| (12) Urocultura                                             |  |  |  |  |  |  |  |
| (13) BAAR                                                   |  |  |  |  |  |  |  |
| (14) PPD                                                    |  |  |  |  |  |  |  |
| (15) Urina I/EAS (elementos anormais no sedimento urinário) |  |  |  |  |  |  |  |
| (16) Parasitológico de fezes                                |  |  |  |  |  |  |  |
| (17) Anti-HIV (Elisa)                                       |  |  |  |  |  |  |  |
| (18) Western-Blot                                           |  |  |  |  |  |  |  |
| (19) Imunofluor para HIV                                    |  |  |  |  |  |  |  |
| (20) S. Hepatite B                                          |  |  |  |  |  |  |  |
| (21) S. Hepatite C                                          |  |  |  |  |  |  |  |
| (22) S. Toxoplasmose                                        |  |  |  |  |  |  |  |
| (23) CD4/CD8                                                |  |  |  |  |  |  |  |
| (24) Carga Viral                                            |  |  |  |  |  |  |  |

77. Faça a mesma caracterização em relação aos exames listados abaixo:

 **CONSIDERAR A DISPONIBILIDADE INDEPENDENTEMENTE DO EXAME SER REALIZADO DENTRO OU FORA DESSE SERVIÇO**

**ESCOLHA UMA ALTERNATIVA POR EXAME**

| OUTROS EXAMES        | Não disponível | Disponível com tempo médio de espera para o resultado de: |                    |                     |                     |                        |                     |
|----------------------|----------------|-----------------------------------------------------------|--------------------|---------------------|---------------------|------------------------|---------------------|
|                      | (A)            | (B)<br>Até 7 dias                                         | (C)<br>8 a 15 dias | (D)<br>16 a 30 dias | (E)<br>31 a 45 dias | (F)<br>46 dias ou mais | (G)<br>Imprevisível |
| (1) Rx Tórax         |                |                                                           |                    |                     |                     |                        |                     |
| (2) Rx Seios da Face |                |                                                           |                    |                     |                     |                        |                     |
| (3) Rx Abdome        |                |                                                           |                    |                     |                     |                        |                     |
| (4) EDA              |                |                                                           |                    |                     |                     |                        |                     |
| (5) USG              |                |                                                           |                    |                     |                     |                        |                     |
| (6) Tomografia       |                |                                                           |                    |                     |                     |                        |                     |
| (7) Broncoscopia     |                |                                                           |                    |                     |                     |                        |                     |

|                        |  |  |  |  |  |  |  |
|------------------------|--|--|--|--|--|--|--|
| (8) Colposcopia        |  |  |  |  |  |  |  |
| (9) Anatomo Patológico |  |  |  |  |  |  |  |
| (10) ECG               |  |  |  |  |  |  |  |

78. A disponibilidade de cota para realização de exames de CD4 é, aproximadamente:

 **Multiplicar a cota mensal por 12 e dividir pelo número de pacientes**

- (1) 1 exame por paciente por ano
- (2) 2 exames por paciente por ano
- (3) 3 exames por paciente por ano
- (4) Mais de 3 exames por paciente por ano
- (5) Exame não disponível

79. A disponibilidade de cota para realização de exames de carga viral é, aproximadamente:

 **Multiplicar a cota mensal por 12 e dividir pelo número de pacientes**

- (1) 1 exame por paciente por ano
- (2) 2 exames por paciente por ano
- (3) 3 exames por paciente por ano
- (4) Mais de 3 exames por paciente por ano
- (5) Exame não disponível

80. Caracterize o acesso e o tempo médio de espera para atendimentos nas seguintes especialidades:

 **CONSIDERAR O ACESSO INDEPENDENTEMENTE DA ESPECIALIDADE SE CONCENTRAR DENTRO OU FORA DESSE SERVIÇO**

**MARCAR UMA ALTERNATIVA POR LINHA**

| ESPECIALIDADES     | Não disponível<br>A | Disponível com tempo médio de espera para acesso de: |                    |                    |                       |                    |
|--------------------|---------------------|------------------------------------------------------|--------------------|--------------------|-----------------------|--------------------|
|                    |                     | B)<br>até 15 dias                                    | C)<br>16 a 45 dias | D)<br>46 a 60 dias | E)<br>mais de 60 dias | F)<br>imprevisível |
| (1) Ginecologia    |                     |                                                      |                    |                    |                       |                    |
| (2) Psiquiatria    |                     |                                                      |                    |                    |                       |                    |
| (3) Neurologia     |                     |                                                      |                    |                    |                       |                    |
| (4) Proctologia    |                     |                                                      |                    |                    |                       |                    |
| (5) Cardiologia    |                     |                                                      |                    |                    |                       |                    |
| (6) Oftalmologia   |                     |                                                      |                    |                    |                       |                    |
| (7) Cirurgia Geral |                     |                                                      |                    |                    |                       |                    |

|                     |  |  |  |  |  |  |
|---------------------|--|--|--|--|--|--|
| (8) Odontologia     |  |  |  |  |  |  |
| (9) Psicologia      |  |  |  |  |  |  |
| (10) Serviço social |  |  |  |  |  |  |

## X. Cuidados de Biossegurança

81. Em caso de acidente com material biológico a conduta é:

**ASSINALE APENAS UMA ALTERNATIVA**

- (1) O funcionário é atendido no próprio serviço para orientações e conduta **até duas horas** após o acidente
- (2) O funcionário é atendido em outro serviço para orientações e conduta **até duas horas** após o acidente
- (3) O funcionário é atendido em outro serviço para orientações e conduta **após duas horas**
- (4) Não existe fluxo estabelecido
- (5) Informação não disponível

82. Os profissionais já receberam treinamento específico nos procedimentos a serem realizados nos casos de exposição ocupacional?

- (1) Não
- (2) Sim

83. O acondicionamento dos resíduos ou lixo contaminados é realizado:

**ASSINALE UMA OU MAIS ALTERNATIVAS**

- (1) Por profissionais desse serviço treinados para esse fim
- (2) Por profissionais desse serviço treinados, com supervisão da enfermeira
- (3) Por profissionais desse serviço não treinados até o momento
- (4) Por profissionais terceirizados treinados com supervisão
- (5) Por profissionais terceirizados treinados
- (6) Por profissionais terceirizados não treinados até o momento
- (7) Outros

## XI. Capacitação de recursos humanos

84. No último ano, esse serviço promoveu ou enviou quais profissionais para reciclagem/capacitação?

**ASSINALE UMA OU MAIS ALTERNATIVAS**

- (1) Médicos
- (2) Enfermeiros
- (3) Assistentes sociais
- (4) Psicólogos

- (5) Nutricionistas
- (6) Dentistas
- (7) Farmacêuticos
- (8) Auxiliares/técnicos de enfermagem
- (9) Auxiliares/técnicos em odontologia
- (10) Pessoal administrativo
- (11) Auxiliares de serviços gerais (limpeza)
- (12) Para nenhuma categoria
- (13) Outros

85. No último ano, esse serviço ofereceu suporte financeiro para seus profissionais participarem de treinamentos, congressos e similares?

- (1) Não
- (2) Sim

86. Nesse serviço existe material de consulta, como textos técnicos e similares?

**ASSINALE APENAS UMA ALTERNATIVA**

- (1) Não
- (2) Sim, mas não existe espaço físico reservado para a consulta
- (3) Sim. O material está disponível em sala de leitura ou equivalente

87. Esse serviço promove sistematicamente reuniões para discussão de casos e condutas clínicas?

**ASSINALE APENAS UMA ALTERNATIVA**

- (1) Não
- (2) Sim, semanalmente
- (3) Sim, quinzenalmente
- (4) Sim, mensalmente
- (5) Sim, apenas quando há necessidade

## **XII. Gerência**

88. A responsabilidade **administrativa** (controle de faltas, férias, alocação de pessoal, contratação) sobre a equipe de assistência à aids nesse serviço é exercida:

**ASSINALE APENAS UMA ALTERNATIVA**

- (1) Pelo gerente desse serviço, que é um profissional não vinculado ao Programa de DST/Aids
- (2) Pelo gerente desse serviço, que é um profissional que integra o Programa de DST/Aids
- (3) Diretamente pela coordenação municipal do Programa de DST/Aids



|                                                                                                                                                                                                                                                                                                                                                                                                                                                                                                                                                                                                                                                                                                             |
|-------------------------------------------------------------------------------------------------------------------------------------------------------------------------------------------------------------------------------------------------------------------------------------------------------------------------------------------------------------------------------------------------------------------------------------------------------------------------------------------------------------------------------------------------------------------------------------------------------------------------------------------------------------------------------------------------------------|
| <p>(4) Diretamente pela Secretaria Municipal de Saúde</p> <p>(5) Outros</p>                                                                                                                                                                                                                                                                                                                                                                                                                                                                                                                                                                                                                                 |
| <p>89. O gerente administrativo especificado anteriormente possui formação para a atividade gerencial?</p> <p style="text-align: center;"><b><u>ASSINALE APENAS UMA ALTERNATIVA</u></b></p> <p>(1) Não</p> <p>(2) Sim, através de especialização em saúde pública</p> <p>(3) Sim, através de especialização em administração em saúde</p> <p>(4) Sim, através de outros cursos de capacitação na área gerencial</p> <p>(5) Outros</p>                                                                                                                                                                                                                                                                       |
| <p>90. A coordenação <b>técnica</b> (responsável pela assistência, reuniões, supervisão etc.) imediata das atividades ambulatoriais desse serviço de HIV/aids é realizada:</p> <p style="text-align: center;"><b><u>ASSINALE APENAS UMA ALTERNATIVA</u></b></p> <p>(1) Pelo gerente desse serviço especializado em HIV/aids</p> <p>(2) Por um coordenador ou chefia técnica da equipe de assistência ambulatorial (<b>mesmo que não formalizado</b>)</p> <p>(3) Pelo coordenador municipal de DST/aids</p> <p>(4) Por um profissional que acumula a função de coordenação local e municipal do Programa de DST/Aids</p> <p>(5) Não existe coordenação direta das atividades de assistência ambulatorial</p> |
| <p>91. As atividades desenvolvidas <b>nesse serviço</b> pelo coordenador técnico da assistência ambulatorial são:</p> <p style="text-align: center;"><b><u>ASSINALE UMA OU MAIS ALTERNATIVAS</u></b></p> <p>(1) Exclusivamente gerenciais</p> <p>(2) A maior parte gerencial e uma pequena parte assistencial</p> <p>(3) Uma grande parte assistencial e pequena parte gerencial</p> <p>(4) Gerência e assistência são realizadas ao mesmo tempo ou na mesma proporção</p> <p>(5) Atividades de ensino</p> <p>(6) Outras</p> <p>(7) Não se aplica, pois não há responsável técnico</p>                                                                                                                      |
| <p>92. O coordenador técnico especificado na questão anterior exerce atividades de coordenação técnica em serviços HIV/aids há:</p> <p>(1) Menos de 1 ano</p> <p>(2) Entre 1 e 3 anos</p> <p>(3) Entre 3 e 6 anos</p> <p>(4) Mais de 6 anos</p> <p>(5) Não há responsável técnico</p>                                                                                                                                                                                                                                                                                                                                                                                                                       |
| <p>93. Esse serviço realiza reuniões de trabalho:</p>                                                                                                                                                                                                                                                                                                                                                                                                                                                                                                                                                                                                                                                       |

**ASSINALE APENAS UMA ALTERNATIVA**

- (1) Semanalmente
- (2) Quinzenalmente
- (3) Mensalmente
- (4) Sem periodicidade definida
- (5) Nunca realiza

94. Que tipo de reuniões de trabalho esse serviço realiza **periodicamente**?

**ASSINALE UMA OU MAIS ALTERNATIVAS**

- (1) Reuniões de caráter gerencial (administrativas)
- (2) Reuniões técnicas/administrativas com toda a equipe multiprofissional
- (3) Reuniões técnicas por categoria profissional
- (4) Reuniões ampliadas com a participação de pacientes ou de entidades representativas (ONGs)
- (5) Outras
- (6) Não há reuniões

95. Quais membros da equipe participam das **reuniões multiprofissionais**:

**ASSINALE UMA OU MAIS ALTERNATIVAS**

- (1) Diretor técnico
- (2) Diretor administrativo
- (3) Chefia médica
- (4) Médicos
- (5) Chefia de enfermagem
- (6) Enfermeiros
- (7) Assistente social
- (8) Psicólogos
- (9) Farmacêuticos
- (10) Auxiliares/técnicos de enfermagem
- (11) Não há esse tipo de reunião

96. Que tipo de atividades esse serviço oferece para minimizar o sofrimento dos profissionais que atendem os pacientes de HIV/aids?

**ASSINALE UMA OU MAIS ALTERNATIVAS**

- (1) Grupos terapêuticos
- (2) Atendimento individual com psicólogos e/ou psiquiatras
- (3) Atividades de lazer e integração (coral, festas, caminhadas etc.)
- (4) Atividades de relaxamento (ioga, shiatsu, tai-chi-chuan, massagens etc.)

- (5) Outras
- (6) Não existem essas atividades

97. Quanto ao suporte técnico-administrativo aos profissionais, são realizadas:

**ASSINALE UMA OU MAIS ALTERNATIVAS**

- (1) Supervisões técnicas
- (2) Supervisões administrativas
- (3) Supervisão institucional
- (4) Supervisão clínica para os psicólogos
- (5) Não há nenhum tipo de supervisão

98. Esse serviço utiliza os dados epidemiológicos disponíveis da região para o planejamento de suas atividades como, por exemplo, o número e o perfil dos casos notificados?

**ASSINALE APENAS UMA ALTERNATIVA**

- (1) Não
- (2) Não, pois os dados não estão disponíveis
- (3) Não, pois os dados estão desatualizados
- (4) Sim

99. No último ano, esse serviço realizou o planejamento de suas atividades:

**ASSINALE UMA OU MAIS ALTERNATIVAS**

- (1) Através da continuidade das atividades desenvolvidas no ano anterior
- (2) Através do cumprimento das metas estabelecidas pela equipe de planejamento do nível central
- (3) Através de plano elaborado pela equipe local desse serviço
- (4) Conforme definido pelo diretor técnico
- (5) Conforme articulação da gerência local com a Coordenação de DST/Aids
- (6) Através de plano elaborado pela equipe e por representantes de pacientes
- (7) Outros
- (8) Não houve planejamento local

100. De que modo o serviço participa da priorização dos recursos financeiros destinados ao financiamento das ações de hiv/aids?

**ASSINALE APENAS UMA ALTERNATIVA**

- (1) O gerente reúne-se com a equipe e com instâncias superiores
- (2) O gerente reúne-se apenas com as instâncias superiores
- (3) Não há participação direta desse serviço nas decisões
- (4) O gerente reúne-se com a equipe, com usuários (comissões municipais, fóruns ou similares) e instâncias superiores

101. Nos últimos 6 meses, esse serviço teve dificuldades gerenciais com:

**ASSINALE UMA OU MAIS ALTERNATIVAS**

- (1) Acesso a exames de laboratório em geral
- (2) Acesso a exames de CD4/Carga Viral
- (3) Medicação anti-retroviral
- (4) Medicação contra infecções oportunistas
- (5) Encaminhamentos para especialidades
- (6) Vagas para internação
- (7) Vagas em hospital dia
- (8) Vagas em maternidade
- (9) Vaga para assistência domiciliar terapêutica
- (10) Contratação de recursos humanos de nível superior
- (11) Contratação de recursos humanos de nível médio (auxiliar/técnico)
- (12) Aquisição de material de consumo
- (13) Aquisição de material permanente
- (14) Outros

102. Diante das dificuldades enfrentadas no gerenciamento, quais as medidas tomadas na busca de soluções?

**ASSINALE UMA OU MAIS ALTERNATIVAS**

- (1) Encaminhamento dos problemas para a direção local
- (2) Notificação à Coordenação Municipal do Programa DST/Aids
- (3) Notificação à Coordenação Estadual de DST/Aids
- (4) Notificação à Coordenação Nacional de DST/Aids
- (5) Comunicado às instâncias de controle social (fórum de ONGs, Conselho Municipal de Aids, Conselho Municipal de Saúde)
- (6) Contato com outros serviços ou instâncias gerenciais para remanejamento de insumos
- (7) Reunião com pacientes
- (8) Aguardo de providências de outras instâncias gerenciais
- (9) Aquisição de insumos com verba de pronto pagamento ou com recursos de projetos
- (10) Outros

103. A avaliação das atividades assistenciais é:

**ASSINALE APENAS UMA ALTERNATIVA**

- (1) Realizada periodicamente para reprogramação das atividades
- (2) Realizada esporadicamente, quando necessária
- (3) Realizada anualmente para prestação de contas
- (4) Realizada pela coordenação estadual ou nacional do programa

(5) Não é realizada

104. As avaliações já realizadas nesse serviço basearam-se em:

**ASSINALE UMA OU MAIS ALTERNATIVAS**

- (1) Dados de produção ambulatorial
- (2) Dados epidemiológicos
- (3) Relatórios de atividades
- (4) Levantamento da satisfação dos usuários
- (5) Auditoria de prontuários
- (6) Levantamento do perfil da demanda
- (7) Não foram realizadas avaliações
- (8) Outros

105. Há alguma forma organizada para encaminhar as reclamações dos pacientes?

**ASSINALE UMA OU MAIS ALTERNATIVAS**

- (1) Não
- (2) Caixa ou livro de sugestões e reclamações
- (3) Linha telefônica municipal específica para reclamações e sugestões
- (4) Sistema de ouvidoria (desse serviço, da secretaria etc.)
- (5) Diretamente junto à direção local desse serviço ou ao conselho gestor
- (6) Outros

106. Existe participação organizada dos pacientes no encaminhamento de soluções de problemas?

**ASSINALE UMA OU MAIS ALTERNATIVAS**

- (1) Não
- (2) Sim, através de ONGs
- (3) Sim, através de conselho gestor ou similar
- (4) Sim, através de outras formas de organização

107. Existe integração rotineira desse serviço com outros órgãos ou instituições não diretamente vinculadas à saúde?

**ASSINALE UMA OU MAIS ALTERNATIVAS**

- (1) Não
- (2) Sim, com o setor judiciário
- (3) Sim, com ONGs
- (4) Sim, com outras secretarias do município ou do estado, como a da educação e a do serviço social
- (5) Sim, com igrejas ou entidades filantrópicas
- (6) Sim, com outros órgãos
